# Supplementary material for: Unravelling the electronic structure, bonding, and magnetic properties of inorganic dysprosocene analogues [Dy(E4)2]− (E = N, P, As, CH)
Source: Royal Society of Chemistry journal article supplement (doi:10.1039/d4cp03016h), 2024-09-25
Supplement: d4cp03016h1.pdf [file d4cp03016h1.pdf]

## Unravelling electronic structure, bonding and magnetic properties in inorganic dysprosocene analogues $[\text{Dy}(\text{E}_4)_2]^{2-}$ (where E= N, P, As, CH)

*Ibtesham Tarannum, Saurabh Kumar Singh\**

*Computational Inorganic Chemistry Group, Department of Chemistry, Indian Institute of Technology Hyderabad, Kandi, Sangareddy, Telangana, India-502284*

### Table of Contents

|                                                                                                                                                                                                                                                                                                                                                     |           |
|-----------------------------------------------------------------------------------------------------------------------------------------------------------------------------------------------------------------------------------------------------------------------------------------------------------------------------------------------------|-----------|
| <b>Figure S1: DFT optimized geometry of <math>[\text{Dy}(\text{E}_4)_2]^-</math> complexes at DKH/BP86 level of theory. ....</b>                                                                                                                                                                                                                    | <b>5</b>  |
| <b>Table S1: Comparison of selected structural parameters of a previously reported complex <math>[\text{Dy}(\text{N}_5)]^+</math> complex. ....</b>                                                                                                                                                                                                 | <b>5</b>  |
| <b>Table S2: Comparison of selected structural parameters of complexes 1-5 optimized at BP86 level of theory. ....</b>                                                                                                                                                                                                                              | <b>5</b>  |
| <b>Table S3: EDA analysis for <math>[\text{Dy}(\text{E}_4)_2]^-</math> complexes. All the values provided here are in the kcal.mol<sup>-1</sup>. ....</b>                                                                                                                                                                                           | <b>6</b>  |
| <b>Table S4: Percentage contribution of the decomposed energies to the total bonding energy for <math>[\text{Dy}(\text{E}_4)_2]^-</math> complexes. ....</b>                                                                                                                                                                                        | <b>6</b>  |
| <b>Table S5: EDA analysis of complexes 1-5 with fragmentation scheme <math>([\text{Dy}(\text{E}_4)]^+ + (\text{E}_4)^{2-})</math>. All the values provided here are in the kcal.mol<sup>-1</sup>. ....</b>                                                                                                                                          | <b>6</b>  |
| <b>Figure S2: DFT computed trends in the total binding energy for complexes 1-5 using fragmentation scheme <math>([\text{Dy}(\text{E}_4)]^+ + (\text{E}_4)^{2-})</math>. ....</b>                                                                                                                                                                   | <b>7</b>  |
| <b>Figure S3: The first four electron deformation densities, <math>\Delta E_{\text{orb}(n)}</math>, along with their eigenvalues for complexes a) 1, b) 2, c) 3. The <math>\Delta E_{\text{orb}(n)}</math> energies are in kcal/mol. ....</b>                                                                                                       | <b>8</b>  |
| <b>Figure S4: The first four electron deformation densities, <math>\Delta E_{\text{orb}(n)}</math>, along with their eigenvalues for complexes a) 4, b) 5. The <math>\Delta E_{\text{orb}(n)}</math> energies are in kcal/mol. ....</b>                                                                                                             | <b>9</b>  |
| <b>Table S6: The shape of the first three highest electron deformation densities, <math>\Delta E_{\text{orb}(1)-(3)}</math> for 1-5 with fragmentation scheme <math>([\text{Dy}(\text{E}_4)]^+ + (\text{E}_4)^{2-})</math>. Isosurface values are 0.0003 au. The <math>\Delta E_{\text{orb}}</math> energies are in kcal.mol<sup>-1</sup>. ....</b> | <b>9</b>  |
| <b>Table S7. Percentage metal contribution (%) to Dy-E bonding NLMOs in complexes 1-5. The major dominating compositions are in bold. ....</b>                                                                                                                                                                                                      | <b>11</b> |
| <b>Table S8. DFT computed the NPA population of various valence Dy(III) orbitals in complexes 1-5. ....</b>                                                                                                                                                                                                                                         | <b>11</b> |
| <b>Table S9: AILFT computed the Slater Condon parameters <math>F^2</math>, <math>F^4</math>, and <math>F^6</math>, the one-electron effective parameters for spin-orbit coupling (<math>\zeta</math>) for complexes 1-5 at NEVPT2 level of theory.</b>                                                                                              |           |

|                                                                                                                                                                                                                                                          |    |
|----------------------------------------------------------------------------------------------------------------------------------------------------------------------------------------------------------------------------------------------------------|----|
| The values in the parenthesis are the CASSCF computed values. All the values provided here are in the $\text{cm}^{-1}$ . .....                                                                                                                           | 11 |
| Table S10: AILFT computed the Racah parameters $E^1$ , $E^2$ , and $E^3$ for complexes 1-5 at the NEVPT2 level of theory. The values in the parenthesis are the CASSCF computed values. All the values provided here are in the $\text{cm}^{-1}$ . ..... | 11 |
| Table S11: Reduction (%) in Slater Condon parameter $F^2$ , $F^4$ , and $F^6$ and Racah parameters $E^1$ , $E^2$ , and $E^3$ for complexes 1-5 at NEVPT2 level of theory. The values in the parenthesis are the CASSCF computed values. ....             | 12 |
| Figure S5: AILFT computed trends in the reduction (%) in Racah parameters ( $E^1$ , $E^2$ , $E^3$ ) (left) and Spin-Orbit Coupling parameters ( $\zeta$ ) (right) for complexes 1-5 at NEVPT2 level of theory. ....                                      | 13 |
| Figure S6: AILFT computed splitting pattern of $4f$ orbitals in complexes 1-5 at NEVPT2 level of theory. ....                                                                                                                                            | 13 |
| Figure S7: SINGLE_ANISO computed g-tensor orientation in complexes 1-5 .....                                                                                                                                                                             | 14 |
| Figure S8: SINGLE_ANISO computed blockade barrier for the complexes (a) 2, (b) 3, (c) 4, (d) 5.....                                                                                                                                                      | 14 |
| Table S12: SINGLE_ANISO computed barrier height ( $U_{\text{cal}}$ ), theoretically calculated $U_{\text{eff}}$ and the three majorly contributed KDs. ....                                                                                              | 15 |
| Table S13: SINGLE_ANISO computed the properties of the two lowest Kramers' doublets of the ${}^6\text{H}_{15/2}$ multiplet in complexes 1-5 in the absence of spin-orbital coupling (SOC-off) for N, P, and As atoms.....                                | 15 |
| Table S14: NEVPT2 computed 21 roots of sextet states along with eight low-lying spin-orbit states for complex 1. All the values are reported here in $\text{cm}^{-1}$ . ....                                                                             | 15 |
| Table S15: NEVPT2 computed 21 roots of sextet states along with eight low-lying spin-orbit states for complexes 2 and 3. All the values are reported herein $\text{cm}^{-1}$ . ....                                                                      | 16 |
| Table S16: NEVPT2 computed 21 roots of sextet states along with eight low-lying spin-orbit states for complexes 4 and 5. All the values are reported herein $\text{cm}^{-1}$ . ....                                                                      | 17 |
| Figure S9: NEVPT2 computed eight low-lying KDs (left) and AILFT computed splitting pattern of $4f$ orbitals (right) for complexes 1, $[\text{Dy}(\text{Cb})_2]^-$ , $[\text{Dy}(\text{Cp}^*)_2]^+$ .....                                                 | 17 |
| Figure S10: NEVPT2 computed blockade barrier for the reversal of magnetization of complexes 1 (a), $[\text{Dy}(\text{Cb})_2]^-$ (b), $[\text{Dy}(\text{Cp}^*)_2]^+$ (c). ....                                                                            | 18 |
| Table S17: NEVPT2 computed 224 roots of quartet for 1. All the values are reported herein $\text{cm}^{-1}$ . ....                                                                                                                                        | 19 |

|                                                                                                                                     |           |
|-------------------------------------------------------------------------------------------------------------------------------------|-----------|
| <b>Table S18: NEVPT2 computed 224 roots of quartet for 2. All the values are reported herein <math>\text{cm}^{-1}</math>.</b> ..... | <b>20</b> |
| <b>Table S19: NEVPT2 computed 224 roots of quartet for 3. All the values are reported herein <math>\text{cm}^{-1}</math>.</b> ..... | <b>21</b> |
| <b>Table S20: NEVPT2 computed 224 roots of quartet for 4. All the values are reported herein <math>\text{cm}^{-1}</math>.</b> ..... | <b>22</b> |
| <b>Table S21: NEVPT2 computed 224 roots of quartet for 5. All the values are reported herein <math>\text{cm}^{-1}</math>.</b> ..... | <b>23</b> |
| <b>Table S22: DFT-optimized geometry coordinates.</b> .....                                                                         | <b>24</b> |
| <b>EDA Input File</b> .....                                                                                                         | <b>25</b> |
| <b>CASSCF Input File</b> .....                                                                                                      | <b>26</b> |

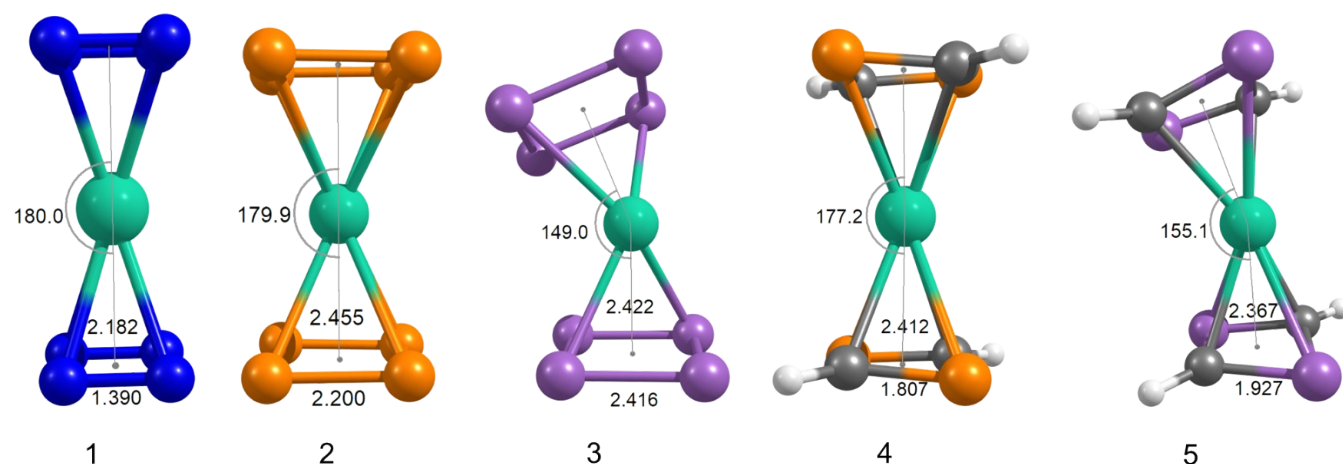

**Figure S1:** DFT optimized geometry of  $[\text{Dy}(\text{E}_4)_2]^-$  complexes at DKH/BP86 level of theory.

**Table S1:** Comparison of selected structural parameters of a previously reported complex  $[\text{Dy}(\text{N}_5)]^+$  complex.

| $[\text{Dy}(\text{N}_5)_2]^+$              | Reported* | Optimized # |
|--------------------------------------------|-----------|-------------|
| Avg. N-N (Å)                               | 1.332     | 1.338       |
| Dy- $L_c$ (Å)                              | 2.225     | 2.242       |
| $\angle L_{\text{cent}}\text{-Dy-}L_c$ (°) | 153.5     | 158.2       |

\*Reported Geometry (*Inorg. Chem.* 2019, 58, 14046–14057) calculation was performed using ORCA/4.1 at meta-GGA TPSSh level of theory and SARC2-ZORA-QZV for Dy and ZORA-def2-TZVP for Nitrogen(N).

#Calculation was performed using ORCA/4.2.1 at GGA BP86 level of theory and SARC2-DKH-TZVP for Dy DKH-def2-SVP for Nitrogen(N).

**Table S2:** Comparison of selected structural parameters of complexes **1-5** optimized at BP86 level of theory.

| Complexes                      | Bond Length (Å) |                       | Bond Angle (°)                              |
|--------------------------------|-----------------|-----------------------|---------------------------------------------|
|                                | Avg. E-E        | Dy- $L_{\text{cent}}$ | $L_{\text{cent}}\text{-Dy-}L_{\text{cent}}$ |
| <b>1</b>                       | 1.393           | 2.182                 | 180.0                                       |
| <b>2</b>                       | 2.200           | 2.470                 | 179.9                                       |
| <b>3</b>                       | 2.416           | 2.422                 | 149.0                                       |
| <b>4</b>                       | 1.807           | 2.412                 | 177.2                                       |
| <b>5</b>                       | 1.927           | 2.367                 | 155.1                                       |
| $[\text{Dy}(\text{Cb})_2]^-$   | 1.444           | 2.339                 | 179.9*                                      |
| $[\text{Dy}(\text{Cp}^*)_2]^+$ | 1.442           | 2.273                 | 148.0                                       |

\*data taken from ref; *Dalton Trans.*, 2023, **52**, 15576-15589

**Table S3:** EDA analysis for  $[\text{Dy}(\text{E}_4)_2]^-$  complexes. All the values provided here are in the  $\text{kcal.mol}^{-1}$ .

| Parameters                                                        | 1       | 2       | 3       | 4       | 5       |
|-------------------------------------------------------------------|---------|---------|---------|---------|---------|
| <b>Pauli Energy (<math>\Delta E_{\text{Pauli}}</math>)</b>        | 207.0   | 172.4   | 208.5   | 176.5   | 202.0   |
| <b>Electrostatic Energy (<math>\Delta E_{\text{elec}}</math>)</b> | -1475.5 | -1134.4 | -1126.4 | -1245.5 | -1234.5 |
| <b>Orbital Interaction (<math>\Delta E_{\text{orb}}</math>)</b>   | -469.1  | -587.8  | -624.0  | -568.9  | -608.7  |
| <b>Dispersion (<math>\Delta E_{\text{disp}}</math>)</b>           | -2.5    | -4.5    | -5.1    | -4.2    | -4.1    |
| <b>Total Bonding Energy (<math>\Delta E_{\text{int}}</math>)</b>  | -1740.1 | -1554.3 | -1547.1 | -1642.0 | -1645.3 |

**Table S4:** Percentage contribution of the decomposed energies to the total bonding energy for  $[\text{Dy}(\text{E}_4)_2]^-$  complexes.

| Complexes | $\Delta E_{\text{Pauli}}$ (%) | $\Delta E_{\text{elec}}$ (%) | $\Delta E_{\text{orb}}$ (%) | $\Delta E_{\text{disp}}$ (%) |
|-----------|-------------------------------|------------------------------|-----------------------------|------------------------------|
| <b>1</b>  | 11.9                          | 84.8                         | 27.0                        | 0.1                          |
| <b>2</b>  | 11.1                          | 73.0                         | 37.8                        | 0.3                          |
| <b>3</b>  | 13.5                          | 72.8                         | 40.3                        | 0.3                          |
| <b>4</b>  | 10.8                          | 75.9                         | 34.6                        | 0.3                          |
| <b>5</b>  | 12.3                          | 75.0                         | 37.0                        | 0.3                          |

% contribution to total binding energy =  $(E/E_{\text{tot}}) * 100$

**Table S5:** EDA analysis of complexes **1-5** with fragmentation scheme  $([\text{Dy}(\text{E}_4)]^+ + (\text{E}_4)^{2-})$ . All the values provided here are in the  $\text{kcal.mol}^{-1}$ .

| Parameters                                                        | 1      | 2      | 3      | 4      | 5      |
|-------------------------------------------------------------------|--------|--------|--------|--------|--------|
| <b>Pauli Repulsion (<math>\Delta E_{\text{Pauli}}</math>)</b>     | 123.2  | 107.9  | 137.1  | 112.7  | 133.0  |
| <b>Electrostatic Energy (<math>\Delta E_{\text{elec}}</math>)</b> | -390.3 | -293.0 | -300.9 | -321.3 | -324.3 |
| <b>Orbital Interaction (<math>\Delta E_{\text{orb}}</math>)</b>   | -133.1 | -134.6 | -142.4 | -134.2 | -142.9 |
| <b>Dispersion (<math>\Delta E_{\text{disp}}</math>)</b>           | -1.7   | -4.5   | -6.7   | -3.3   | -4.1   |
| <b>Total Bonding Energy (<math>\Delta E_{\text{int}}</math>)</b>  | -401.9 | -324.2 | -312.8 | -346.2 | -338.3 |

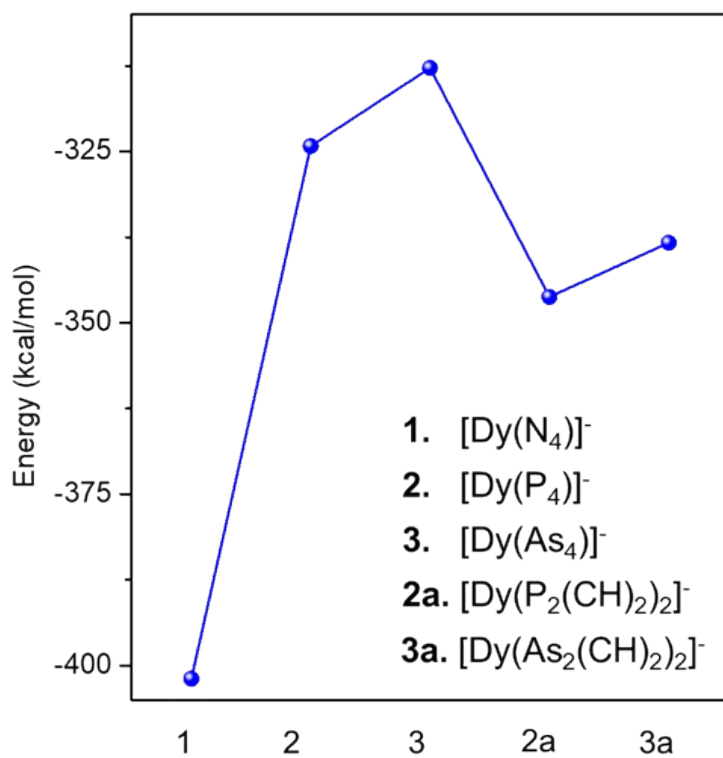

**Figure S2:** DFT computed trends in the total binding energy for complexes 1-5 using fragmentation scheme ((Dy(E<sub>4</sub>))<sup>+</sup> + (E<sub>4</sub>)<sup>2-</sup>).

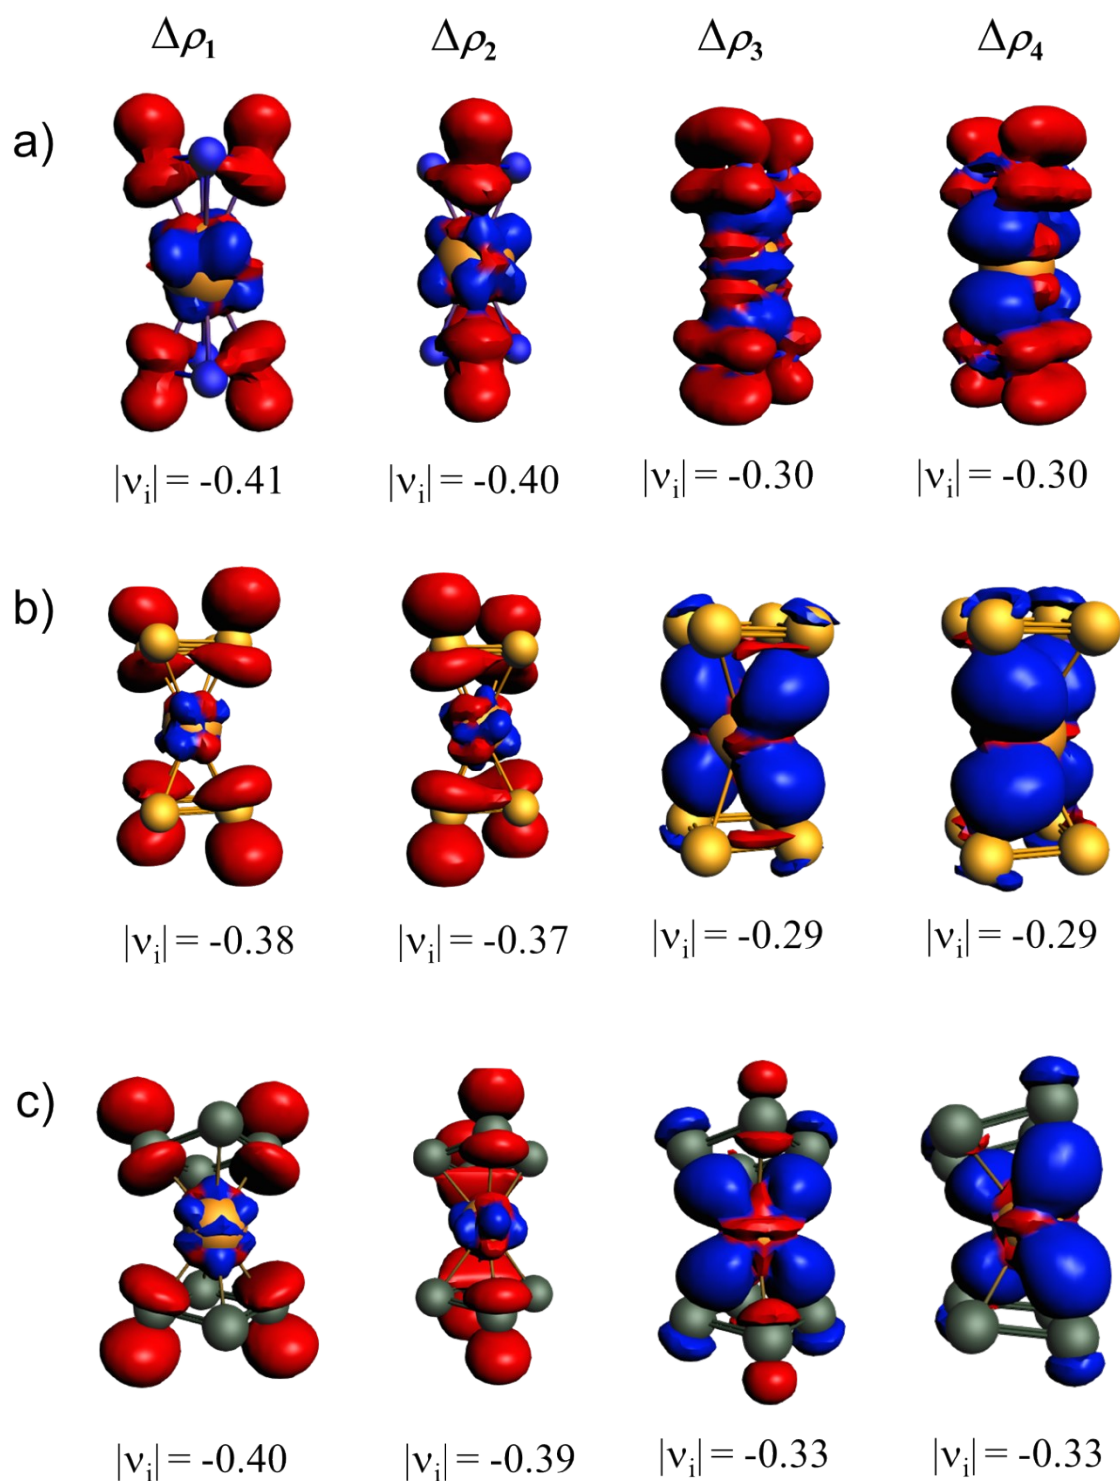

**Figure S3:** The first four electron deformation densities,  $\Delta E_{\text{orb}(n)}$ , along with their eigenvalues for complexes a) **1**, b) **2**, c) **3**. The  $\Delta E_{\text{orb}(n)}$  energies are in kcal/mol.

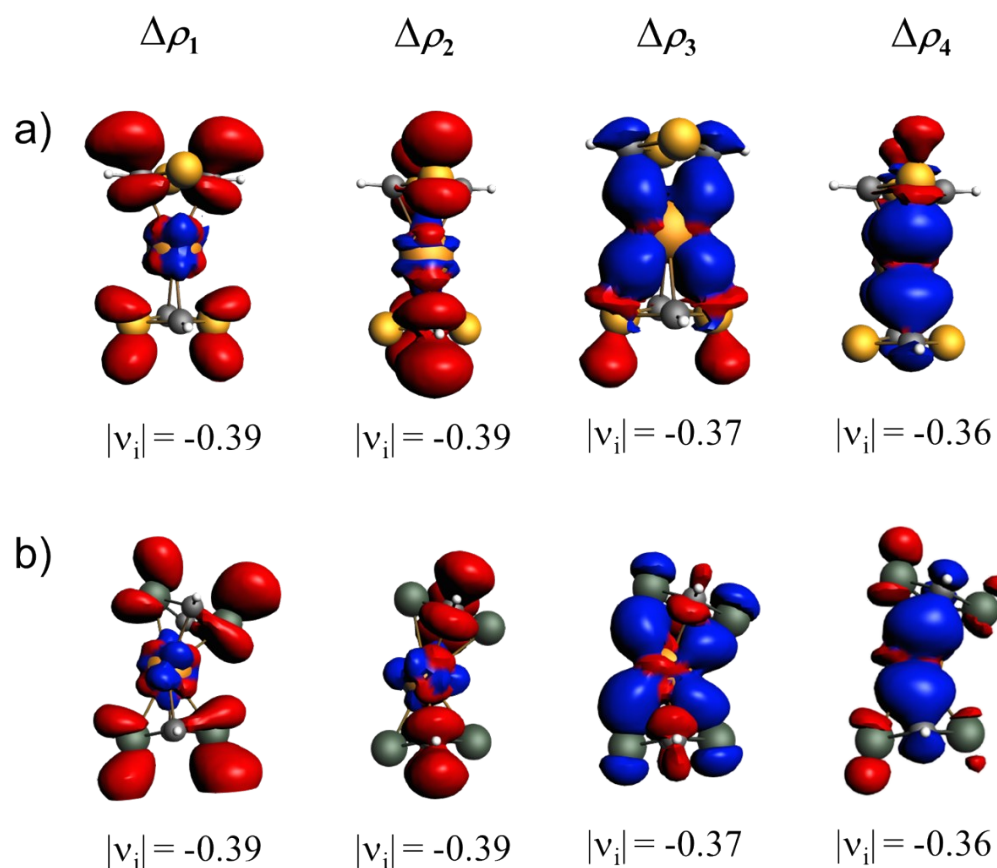

**Figure S4:** The first four electron deformation densities,  $\Delta E_{\text{orb}(n)}$ , along with their eigenvalues for complexes a) 4, b) 5. The  $\Delta E_{\text{orb}(n)}$  energies are in kcal/mol.

**Table S6:** The shape of the first three highest electron deformation densities,  $\Delta E_{\text{orb}(1)-(3)}$  for 1-5 with fragmentation scheme  $((\text{Dy}(\text{E}_4))^+ + (\text{E}_4)^{2-})$ . Isosurface values are 0.0003 au. The  $\Delta E_{\text{orb}}$  energies are in kcal.mol<sup>-1</sup>.

| Complexes | $\Delta E_{\text{orb}(1)}$                                                                                                                                          | $\Delta E_{\text{orb}(2)}$                                                                                                                                          | $\Delta E_{\text{orb}(3)}$                                                                                                                                              |
|-----------|---------------------------------------------------------------------------------------------------------------------------------------------------------------------|---------------------------------------------------------------------------------------------------------------------------------------------------------------------|-------------------------------------------------------------------------------------------------------------------------------------------------------------------------|
| <b>1</b>  | 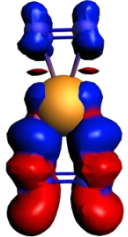<br>$\Delta\rho_{(\pi)}$<br>$\Delta E_{\text{orb}(1)} = -17.1$ ; $ v_1  = -0.25$ | <br>$\Delta\rho_{(\pi)}$<br>$\Delta E_{\text{orb}(1)} = -17.1$ ; $ v_1  = -0.25$ | <br>$\Delta\rho_{(\sigma)}$<br>$\Delta E_{\text{orb}(1)} = -7.5$ ; $ v_1  = -0.13$ |



|   |                                                                                                                                                                                                                         |                                                                                                                                                                                                                          |                                                                                                                                                                                                                           |
|---|-------------------------------------------------------------------------------------------------------------------------------------------------------------------------------------------------------------------------|--------------------------------------------------------------------------------------------------------------------------------------------------------------------------------------------------------------------------|---------------------------------------------------------------------------------------------------------------------------------------------------------------------------------------------------------------------------|
| 2 | 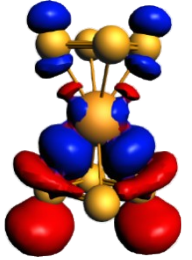 <p style="text-align: center;"> <math>\Delta\rho(\pi)</math><br/> <math>\Delta E_{\text{orb}(1)} = -17.1;  v_1  = -0.29</math> </p>   |  <p style="text-align: center;"> <math>\Delta\rho(\pi)</math><br/> <math>\Delta E_{\text{orb}(1)} = -16.2;  v_1  = -0.29</math> </p>   |  <p style="text-align: center;"> <math>\Delta\rho(\sigma)</math><br/> <math>\Delta E_{\text{orb}(1)} = -9.2;  v_1  = -0.17</math> </p> |
| 3 |  <p style="text-align: center;"> <math>\Delta\rho(\pi)</math><br/> <math>\Delta E_{\text{orb}(1)} = -17.7;  v_1  = -0.31</math> </p>   |  <p style="text-align: center;"> <math>\Delta\rho(\pi)</math><br/> <math>\Delta E_{\text{orb}(1)} = -16.9;  v_1  = -0.29</math> </p>   |  <p style="text-align: center;"> <math>\Delta\rho(\sigma)</math><br/> <math>\Delta E_{\text{orb}(1)} = -7.4;  v_1  = -0.18</math> </p> |
| 4 |  <p style="text-align: center;"> <math>\Delta\rho(\pi)</math><br/> <math>\Delta E_{\text{orb}(1)} = -19.0;  v_1  = -0.61</math> </p> |  <p style="text-align: center;"> <math>\Delta\rho(\pi)</math><br/> <math>\Delta E_{\text{orb}(1)} = -16.8;  v_1  = -0.31</math> </p> |  <p style="text-align: center;"> <math>\Delta\rho(\pi)</math><br/> <math>\Delta E_{\text{orb}(1)} = -14.3;  v_1  = -0.26</math> </p> |
| 5 |  <p style="text-align: center;"> <math>\Delta\rho(\pi)</math><br/> <math>\Delta E_{\text{orb}(1)} = -20.1;  v_1  = -0.63</math> </p> |  <p style="text-align: center;"> <math>\Delta\rho(\pi)</math><br/> <math>\Delta E_{\text{orb}(1)} = -15.8;  v_1  = -0.28</math> </p> |  <p style="text-align: center;"> <math>\Delta\rho(\pi)</math><br/> <math>\Delta E_{\text{orb}(1)} = -15.4;  v_1  = -0.32</math> </p> |

**Table S7.** Percentage metal contribution (%) to Dy-E bonding NLMOs in complexes **1-5**. The major dominating compositions are in bold.

| Complexes | %M   | M (s+p) | M (d)      | M (f) |
|-----------|------|---------|------------|-------|
| <b>1</b>  | 8.4  | 1.6     | <b>6.6</b> | 0.2   |
| <b>2</b>  | 9.7  | 1.1     | <b>6.7</b> | 1.9   |
| <b>3</b>  | 10.9 | 0.4     | <b>8.0</b> | 2.4   |
| <b>4</b>  | 8.4  | 0.9     | <b>6.2</b> | 1.3   |
| <b>5</b>  | 8.2  | 0.8     | <b>5.5</b> | 1.9   |

**Table S8.** DFT computed the NPA population of various valence Dy(III) orbitals in complexes **1-5**.

| Complexes | 4f   | 5d   | 6p   |
|-----------|------|------|------|
| <b>1</b>  | 9.07 | 0.88 | 0.03 |
| <b>2</b>  | 9.06 | 1.04 | 0.06 |
| <b>3</b>  | 9.03 | 1.28 | 0.03 |
| <b>4</b>  | 9.05 | 0.96 | 0.08 |
| <b>5</b>  | 9.03 | 1.12 | 0.05 |

**Table S9:** AILFT computed the Slater Condon parameters  $F^2$ ,  $F^4$ , and  $F^6$ , the one-electron effective parameters for spin-orbit coupling ( $\zeta$ ) for complexes **1-5** at NEVPT2 level of theory. The values in the parenthesis are the CASSCF computed values. All the values provided here are in the  $\text{cm}^{-1}$ .

|         | Dy(III) ion            | 1                      | 2                      | 3                      | 4                      | 5                      |
|---------|------------------------|------------------------|------------------------|------------------------|------------------------|------------------------|
| $F^2$   | 109690.9<br>(121962.8) | 107521.2<br>(120860.3) | 107443.4<br>(120938.3) | 107263.5<br>(120867.9) | 107380.8<br>(120884.0) | 107193.9<br>(120794.4) |
| $F^4$   | 70551.8<br>(76517.7)   | 70173.3<br>(75631.5)   | 70136.7<br>(75740.7)   | 70125.3<br>(75725.1)   | 70173.6<br>(75680.0)   | 70213.5<br>(75641.6)   |
| $F^6$   | 55412.5<br>(55041.9)   | 54747.9<br>(54465.2)   | 54859.3<br>(54507.2)   | 54819.6<br>(54490.4)   | 54814.2<br>(54477.4)   | 54755.1<br>(54447.3)   |
| $\zeta$ | 1742.2                 | 1733.7                 | 1732.3                 | 1731.4                 | 1732.3                 | 1731.2                 |

**Table S10:** AILFT computed the Racah parameters  $E^1$ ,  $E^2$ , and  $E^3$  for complexes **1-5** at the NEVPT2 level of theory. The values in the parenthesis are the CASSCF computed values. All the values provided here are in the  $\text{cm}^{-1}$ .

|       | Dy(III) ion        | 1                  | 2                  | 3                  | 4                  | 5                  |
|-------|--------------------|--------------------|--------------------|--------------------|--------------------|--------------------|
| $E^1$ | 7129.0<br>(7682.6) | 7025.0<br>(7606.2) | 7024.8<br>(7612.7) | 7017.1<br>(7609.4) | 7022.2<br>(7608.5) | 7014.9<br>(7603.6) |
| $E^2$ | 38.4 (42.6)        | 37.4 (42.3)        | 37.4 (42.3)        | 37.3 (42.3)        | 37.3 (42.3)        | 37.2 (42.3)        |

## Supporting Information

|                      |                  |                  |                  |                  |                  |                  |
|----------------------|------------------|------------------|------------------|------------------|------------------|------------------|
| <b>E<sup>3</sup></b> | 713.8<br>(817.2) | 699.7<br>(809.7) | 698.6<br>(810.3) | 697.5<br>(809.9) | 698.4<br>(810.0) | 697.4<br>(809.3) |
|----------------------|------------------|------------------|------------------|------------------|------------------|------------------|

**Table S11:** Reduction (%) in Slater Condon parameter F<sup>2</sup>, F<sup>4</sup>, and F<sup>6</sup> and Racah parameters E<sup>1</sup>, E<sup>2</sup>, and E<sup>3</sup> for complexes **1-5** at NEVPT2 level of theory. The values in the parenthesis are the CASSCF computed values.

|          | <b>F<sup>2</sup>(%)</b> | <b>F<sup>4</sup>(%)</b> | <b>F<sup>6</sup>(%)</b> | <b>ζ(%)</b> | <b>E<sup>1</sup>(%)</b> | <b>E<sup>2</sup>(%)</b> | <b>E<sup>3</sup>(%)</b> |
|----------|-------------------------|-------------------------|-------------------------|-------------|-------------------------|-------------------------|-------------------------|
| <b>1</b> | 2.0 (0.9)               | 0.5 (1.2)               | 1.2 (1.0)               | 0.5         | 1.5 (1.0)               | 2.7 (0.8)               | 2.0 (0.9)               |
| <b>2</b> | 2.0 (0.8)               | 0.6 (1.0)               | 1.0 (1.0)               | 0.6         | 1.5 (0.9)               | 2.7 (0.8)               | 2.1 (0.8)               |
| <b>3</b> | 2.2 (0.9)               | 0.6 (1.0)               | 1.1 (1.0)               | 0.6         | 1.6 (1.0)               | 2.9 (0.8)               | 2.3 (0.9)               |
| <b>4</b> | 2.1 (0.9)               | 0.5 (1.1)               | 1.1 (1.0)               | 0.6         | 1.5 (1.0)               | 2.8 (0.8)               | 2.1 (0.9)               |
| <b>5</b> | 2.3 (1.0)               | 0.5 (1.1)               | 1.2 (1.1)               | 0.6         | 1.6 (1.0)               | 3.1 (0.9)               | 2.3 (1.0)               |

Reduction (%) = [1- (complex/free-ion)] \* 100

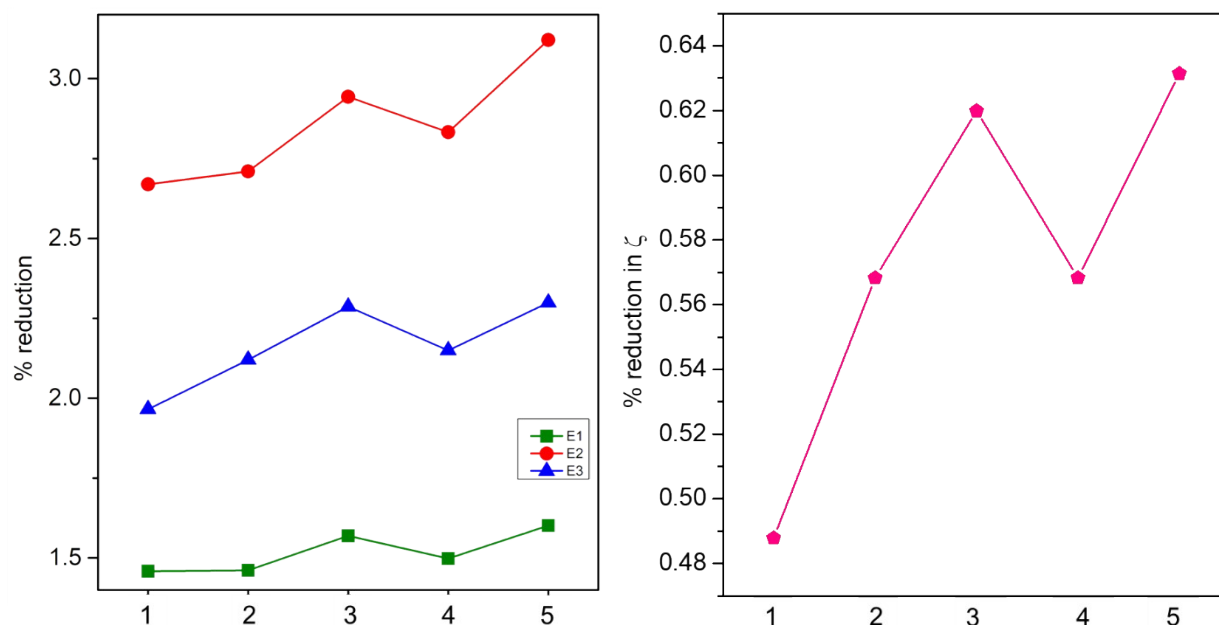

**Figure S5:** AILFT computed trends in the reduction (%) in Racah parameters ( $E^1$ ,  $E^2$ ,  $E^3$ ) (left) and Spin-Orbit Coupling parameters ( $\zeta$ ) (right) for complexes **1-5** at NEVPT2 level of theory.

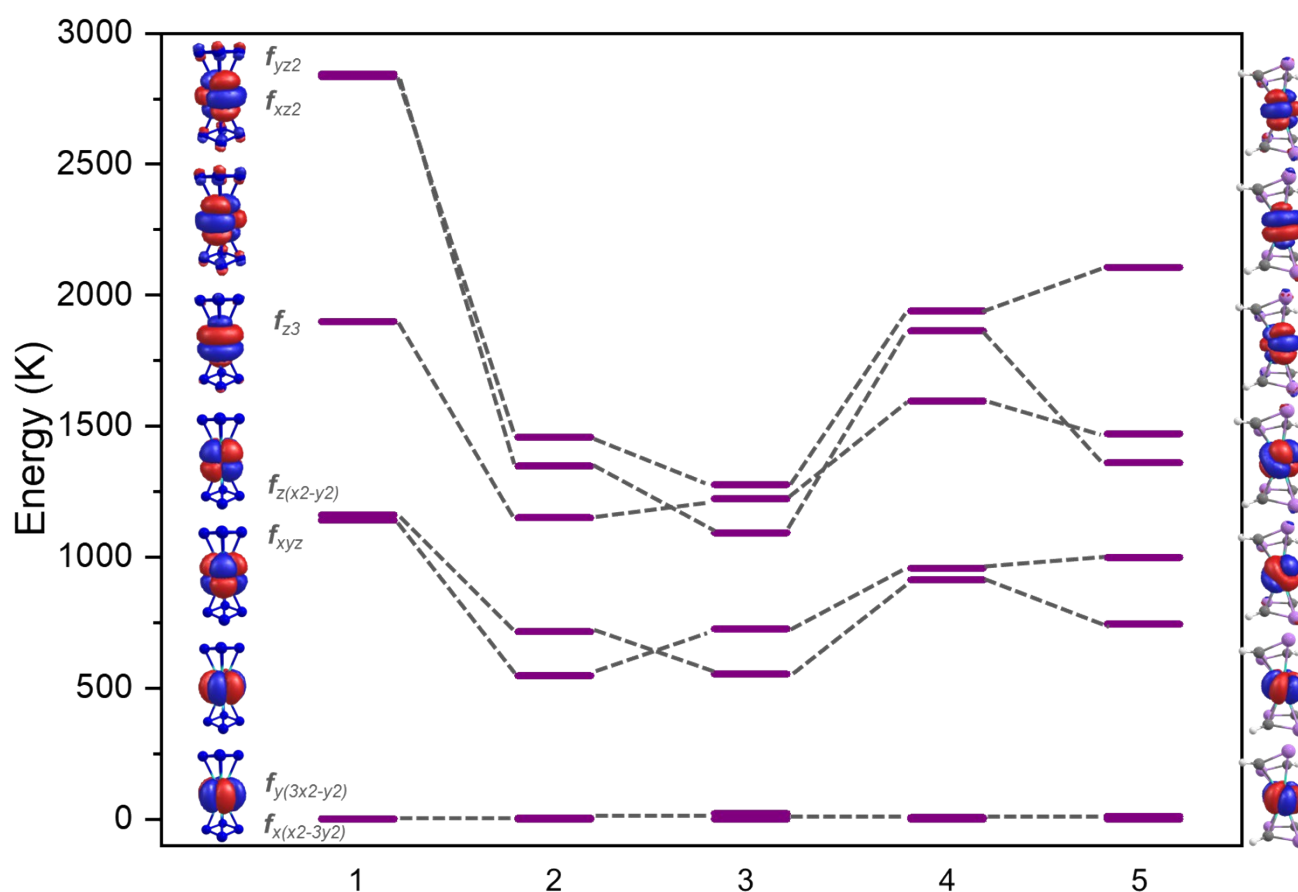

**Figure S6:** AILFT computed splitting pattern of 4f orbitals in complexes **1-5** at NEVPT2 level of theory.

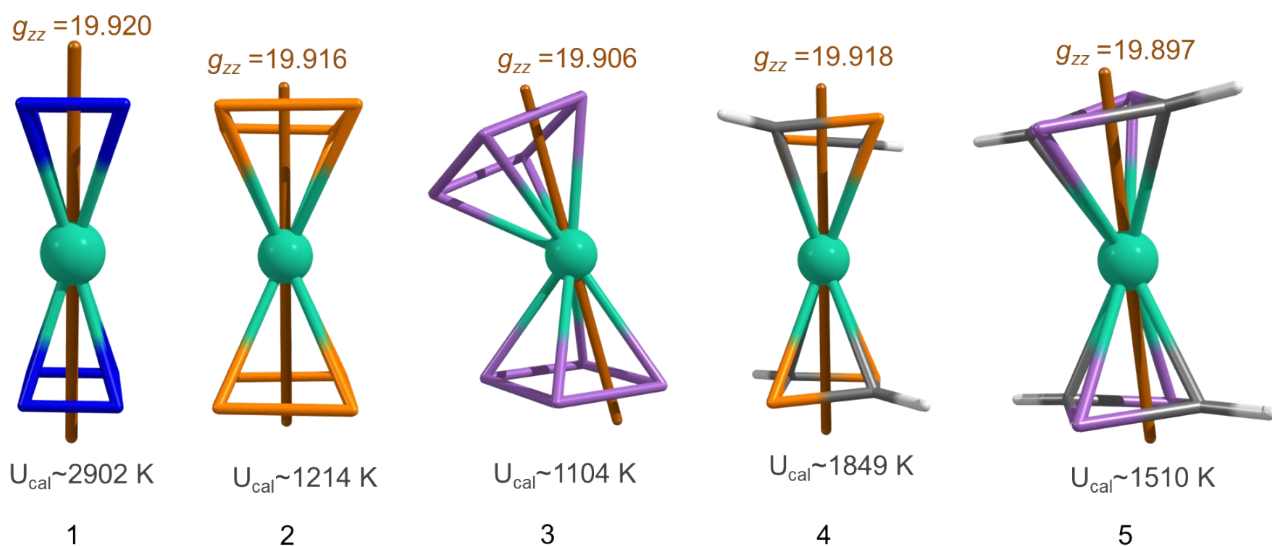

**Figure S7:** SINGLE\_ANISO computed g-tensor orientation in complexes 1-5

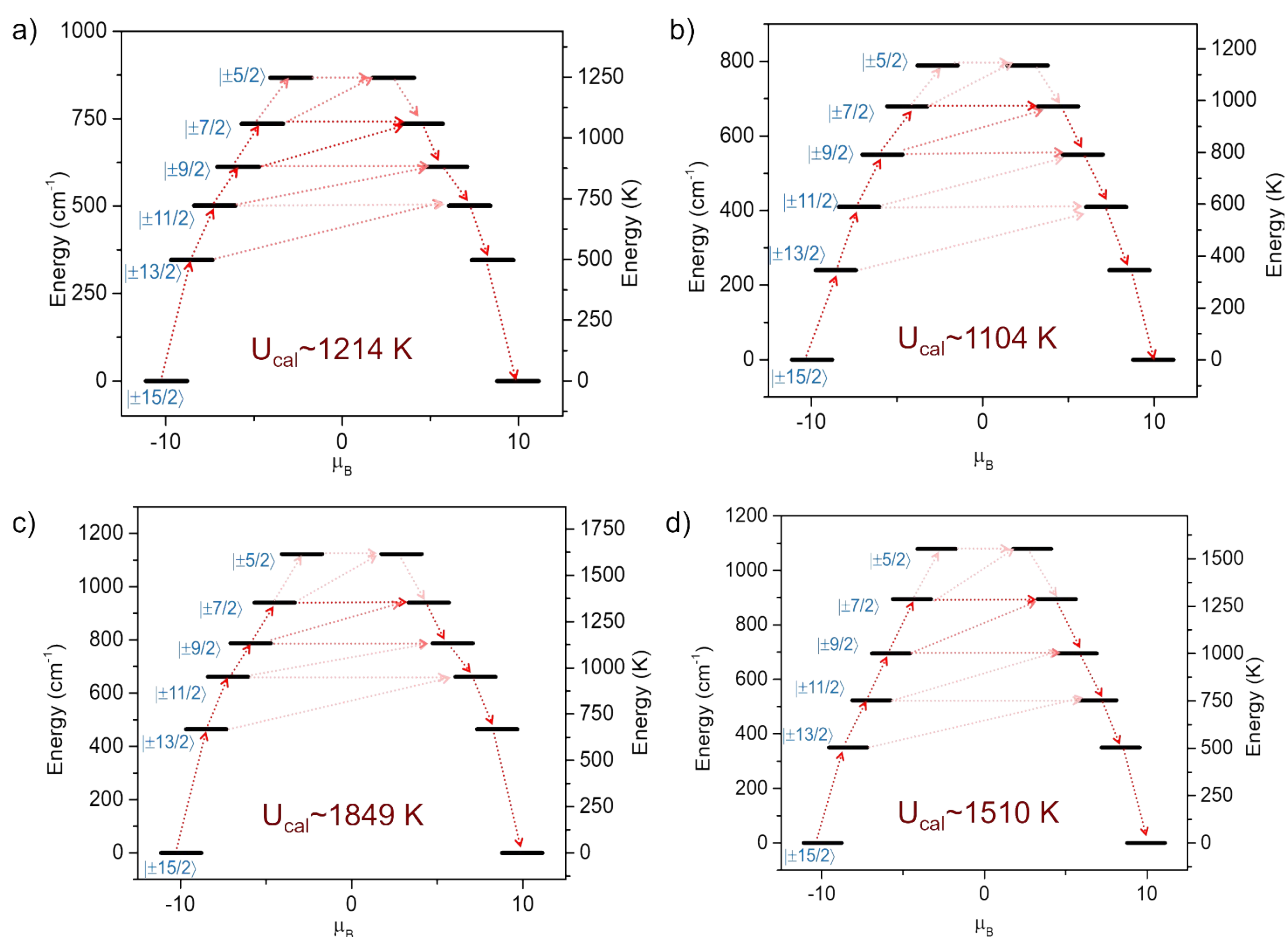

**Figure S8:** SINGLE\_ANISO computed blockade barrier for the complexes (a) 2, (b) 3, (c) 4, (d) 5.

**Table S12:** SINGLE\_ANISO computed barrier height ( $U_{\text{cal}}$ ), theoretically calculated  $U_{\text{eff}}$  and the three majorly contributed KDs.

| Complexes | $U_{\text{cal}}$ (K) | $U_{\text{eff}}$ (K) | % contribution from KDs     |
|-----------|----------------------|----------------------|-----------------------------|
| <b>1</b>  | 2270.1               | 2416.0               | 40% KD5 + 39% KD6 + 30% KD8 |
| <b>2</b>  | 1213.9               | 1355.0               | 36% KD6 + 26% KD7 + 27% KD8 |
| <b>3</b>  | 1104.4               | 1175.0               | 19% KD5 + 31% KD6 + 27% KD8 |
| <b>4</b>  | 1849.3               | 1766.0               | 53% KD5 + 32% KD6 + 26% KD8 |
| <b>5</b>  | 1509.9               | 1366.0               | 21% KD5 + 18% KD6 + 16% KD7 |

**Table S13:** SINGLE\_ANISO computed the properties of the two lowest Kramers' doublets of the  ${}^6\text{H}_{15/2}$  multiplet in complexes **1-5** in the absence of spin-orbital coupling (SOC-off) for N, P, and As atoms.

|          | KD  | E / K  | $g_{xx}$ | $g_{yy}$ | $g_{zz}$ | $\theta$ | $m_J$              | $U_{\text{cal}}/\text{K}$ |
|----------|-----|--------|----------|----------|----------|----------|--------------------|---------------------------|
| <b>1</b> | KD1 | 0.0    | 0.000    | 0.000    | 19.776   | -        | $ \pm 15/2\rangle$ | 2805.1                    |
|          | KD2 | 1137.7 | 0.011    | 0.011    | 16.919   | 0.9      | $ \pm 13/2\rangle$ |                           |
| <b>2</b> | KD1 | 0      | 0.000    | 0.000    | 19.768   | -        | $ \pm 15/2\rangle$ | 1032.8                    |
|          | KD2 | 473.5  | 0.001    | 0.001    | 17.034   | 0.0      | $ \pm 13/2\rangle$ |                           |
| <b>3</b> | KD1 | 0.0    | 0.000    | 0.000    | 19.757   | -        | $ \pm 15/2\rangle$ | 953.9                     |
|          | KD2 | 334.2  | 0.000    | 0.000    | 17.066   | 0.1      | $ \pm 13/2\rangle$ |                           |
| <b>4</b> | KD1 | 0.0    | 0.000    | 0.000    | 19.771   | -        | $ \pm 15/2\rangle$ | 1833.5                    |
|          | KD2 | 643.8  | 0.007    | 0.007    | 17.022   | 1.7      | $ \pm 13/2\rangle$ |                           |
| <b>5</b> | KD1 | 0      | 0.000    | 0.000    | 19.746   | -        | $ \pm 15/2\rangle$ | 1514.8                    |
|          | KD2 | 490.0  | 0.018    | 0.025    | 16.749   | 0.2      | $ \pm 13/2\rangle$ |                           |

**Table S14:** NEVPT2 computed 21 roots of sextet states along with eight low-lying spin-orbit states for complex **1**. All the values are reported here in  $\text{cm}^{-1}$ .

| <b>1</b>       |                  |                   |
|----------------|------------------|-------------------|
| Term           | Spin-free states | Spin-orbit states |
| ${}^6\text{H}$ | 0.0              | 0.0               |
|                | 0.1              | 775.6             |
|                | 1009.6           | 1055.2            |
|                | 1009.6           | 1168.2            |
|                | 1432.5           | 1355.83           |
|                | 1486.5           | 1621.47           |

|                      |         |         |
|----------------------|---------|---------|
| <b><sup>6</sup>F</b> | 1488.9  | 1897.36 |
|                      | 1511.9  | 2073.31 |
|                      | 2144.9  |         |
|                      | 2148.5  |         |
|                      | 2276.3  |         |
|                      | 7194.2  |         |
|                      | 7198.1  |         |
|                      | 7458.4  |         |
| <b><sup>6</sup>P</b> | 7492.4  |         |
|                      | 7822.0  |         |
|                      | 7851.2  |         |
|                      | 7851.4  |         |
|                      | 28635.1 |         |
|                      | 30800.2 |         |
|                      | 30810.4 |         |

**Table S15:** NEVPT2 computed 21 roots of sextet states along with eight low-lying spin-orbit states for complexes **2** and **3**. All the values are reported herein cm<sup>-1</sup>.

| <b>2</b>                 |                         |                      | <b>3</b>                |                          |
|--------------------------|-------------------------|----------------------|-------------------------|--------------------------|
| <b>Spin-orbit states</b> | <b>Spin-free states</b> | <b>Term</b>          | <b>Spin-free states</b> | <b>Spin-orbit states</b> |
| 0.0                      | 0.0                     | <b><sup>6</sup>H</b> | 0.0                     | 0.0                      |
| 345.7                    | 0.3                     |                      | 1.5                     | 240.4                    |
| 501.5                    | 572.7                   |                      | 377.6                   | 409.7                    |
| 612.6                    | 576.3                   |                      | 386.9                   | 550.1                    |
| 735.5                    | 578.6                   |                      | 534.8                   | 679.6                    |
| 867.1                    | 586.4                   |                      | 588.6                   | 789.2                    |
| 999.4                    | 724.4                   |                      | 709.9                   | 890.4                    |
| 1082.3                   | 871.9                   |                      | 831.6                   | 928.7                    |
|                          | 1056.2                  |                      | 931.7                   |                          |
|                          | 1105.2                  |                      | 942.1                   |                          |
|                          | 1175.1                  |                      | 979.4                   |                          |
|                          | 6568.1                  | <b><sup>6</sup>F</b> | 6474.9                  |                          |
|                          | 6601.4                  |                      | 6537.8                  |                          |
|                          | 6660.0                  |                      | 6554.2                  |                          |
|                          | 6719.9                  |                      | 6562.2                  |                          |
|                          | 6748.5                  |                      | 6636.2                  |                          |
|                          | 6871.1                  |                      | 6746.3                  |                          |
|                          | 6872.2                  |                      | 6758.6                  |                          |
|                          | 28531.5                 | <b><sup>6</sup>P</b> | 28438.0                 |                          |
|                          | 29579.3                 |                      | 29381.4                 |                          |
|                          | 29679.0                 |                      | 29498.0                 |                          |

**Table S16:** NEVPT2 computed 21 roots of sextet states along with eight low-lying spin-orbit states for complexes **4** and **5**. All the values are reported herein  $\text{cm}^{-1}$ .

| <b>4</b>                 |                         | <b>Term</b>          | <b>5</b>                |                          |
|--------------------------|-------------------------|----------------------|-------------------------|--------------------------|
| <b>Spin-orbit states</b> | <b>Spin-free states</b> |                      | <b>Spin-free states</b> | <b>Spin-orbit states</b> |
| 0.0                      | 0.0                     | <b><sup>6</sup>H</b> | 0.0                     | 0.0                      |
| 261.4                    | 0.0                     |                      | 0.5                     | 350.3                    |
| 488.7                    | 420.9                   |                      | 527.6                   | 523.4                    |
| 681.9                    | 420.9                   |                      | 561.8                   | 695.3                    |
| 840.4                    | 735.3                   |                      | 602.3                   | 894.4                    |
| 972.8                    | 735.4                   |                      | 667.5                   | 1078.5                   |
| 1061.4                   | 959.6                   |                      | 997.7                   | 1229.3                   |
| 1101.7                   | 965.3                   |                      | 1151.7                  | 1330.3                   |
|                          | 1099.9                  |                      | 1329.6                  |                          |
|                          | 1103.6                  |                      | 1358.7                  |                          |
|                          | 1141.0                  |                      | 1432.6                  |                          |
|                          | 6717.1                  | <b><sup>6</sup>F</b> | 6552.2                  |                          |
|                          | 6758.0                  |                      | 6781.8                  |                          |
|                          | 6760.4                  |                      | 6828.9                  |                          |
|                          | 6879.1                  |                      | 6852.5                  |                          |
|                          | 6883.1                  |                      | 6901.8                  |                          |
|                          | 7063.8                  |                      | 7059.8                  |                          |
|                          | 7063.8                  |                      | 7066.6                  |                          |
|                          | 29099.4                 | <b><sup>6</sup>P</b> | 28427.5                 |                          |
|                          | 30447.9                 |                      | 29583.5                 |                          |
|                          | 30457.0                 |                      | 30003.1                 |                          |

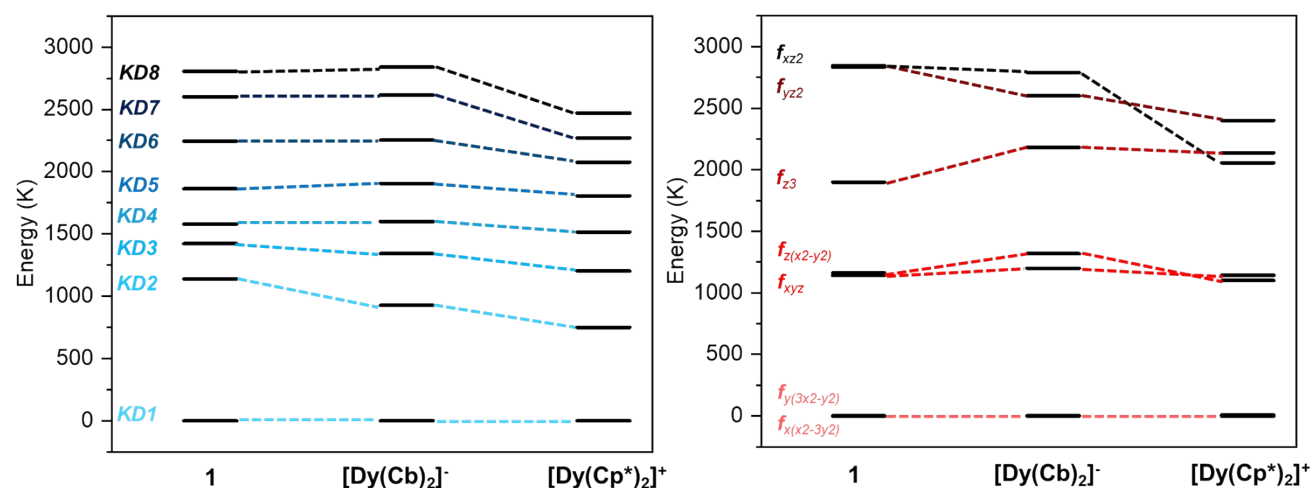**Figure S9:** NEVPT2 computed eight low-lying KDs (left) and AILFT computed splitting pattern of 4f orbitals (right) for complexes **1**, [Dy(Cb)<sub>2</sub>]<sup>-</sup>, [Dy(Cp\*)<sub>2</sub>]<sup>+</sup>.



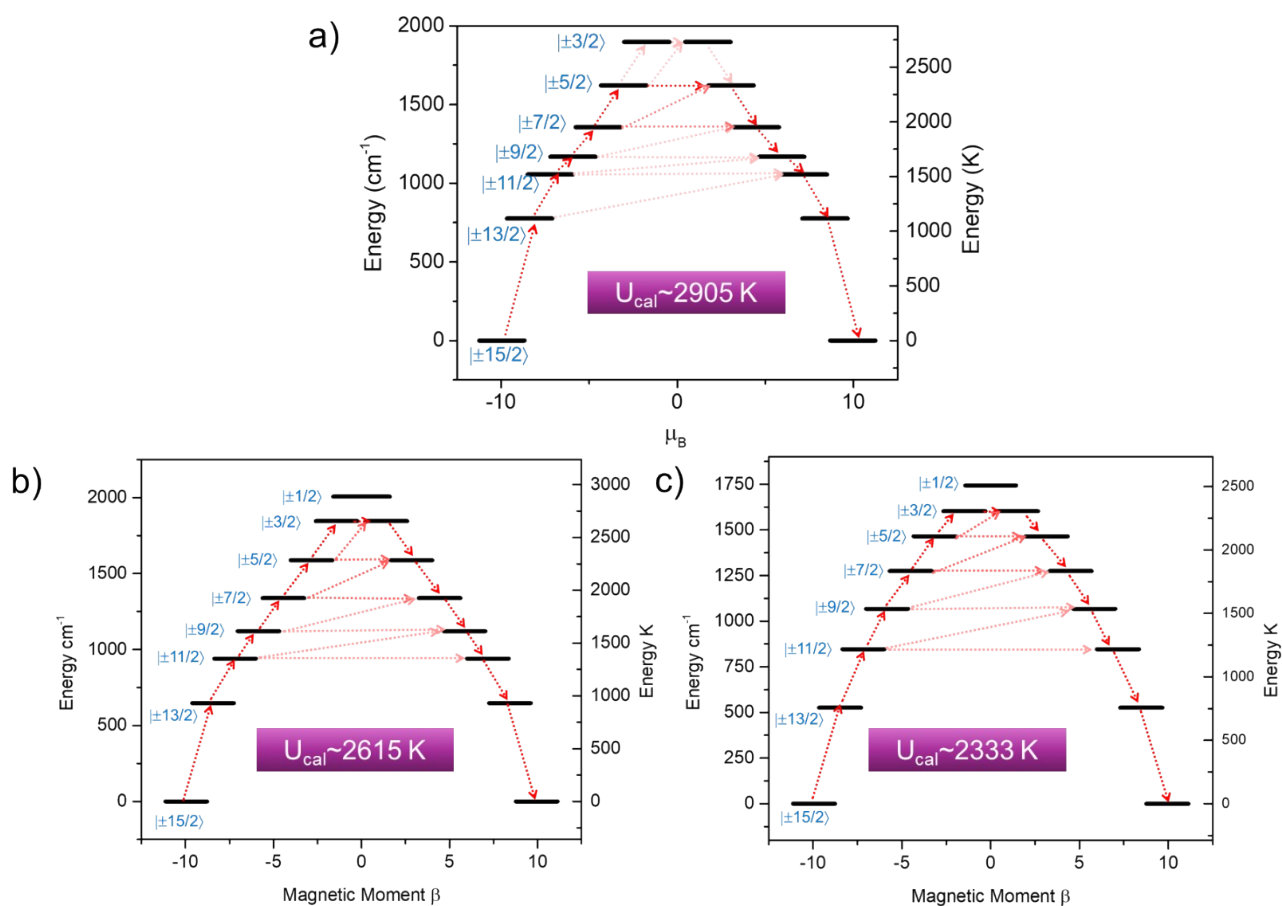

**Figure S10:** NEVPT2 computed blockade barrier for the reversal of magnetization of complexes **1** (a), [Dy(Cb)<sub>2</sub>]<sup>-</sup> (b), [Dy(Cp\*)<sub>2</sub>]<sup>+</sup> (c).

**Table S17:** NEVPT2 computed 224 roots of quartet for **1**. All the values are reported herein cm<sup>-1</sup>.

| <b>1</b>               |         |         |         |         |
|------------------------|---------|---------|---------|---------|
| <b>Spin-free State</b> |         |         |         |         |
| 24055.3                | 27937.1 | 33822.0 | 53170.3 | 70800.9 |
| 24058.4                | 28881.1 | 33823.8 | 53399.4 | 71235.2 |
| 24316.5                | 28881.1 | 33926.4 | 53462.5 | 71235.2 |
| 24316.5                | 29674.5 | 33926.7 | 53463.3 | 71284.2 |
| 24456.0                | 29674.5 | 34134.1 | 53970.4 | 71285.5 |
| 24488.2                | 30013.8 | 34137.1 | 53973.4 | 71479.6 |
| 24656.6                | 30014.0 | 34867.3 | 54142.1 | 71504.6 |
| 24692.8                | 30108.9 | 34880.2 | 54150.0 | 72282.2 |
| 24696.6                | 30109.3 | 35109.7 | 54176.4 | 72621.2 |
| 24719.1                | 30270.4 | 35183.4 | 54458.9 | 72625.0 |
| 25098.0                | 30270.4 | 35204.0 | 54459.2 | 75078.5 |
| 25107.3                | 30398.0 | 35309.2 | 54779.4 | 75698.4 |
| 25113.3                | 30406.8 | 35311.6 | 54779.4 | 75705.4 |
| 25117.1                | 30503.3 | 35971.1 | 58331.8 | 77324.5 |
| 25207.6                | 30523.1 | 36275.1 | 58334.6 | 77331.5 |
| 25282.3                | 30592.2 | 36287.3 | 58340.3 | 80204.2 |
| 25335.3                | 30593.5 | 36313.0 | 58376.1 | 80242.0 |
| 25428.5                | 30694.1 | 36313.2 | 58423.5 | 80254.9 |
| 25430.1                | 30694.9 | 40610.8 | 58481.8 | 80255.0 |
| 25431.8                | 30748.1 | 40619.0 | 58482.9 | 80308.3 |
| 25436.5                | 30767.9 | 41566.7 | 58777.5 | 80404.3 |
| 25439.1                | 30835.4 | 41640.5 | 58778.2 | 80405.4 |
| 25612.8                | 30972.4 | 41697.0 | 59214.5 | 81188.1 |
| 25638.1                | 32197.1 | 42013.8 | 59214.5 | 81188.1 |
| 25638.1                | 32263.6 | 42014.0 | 59830.4 | 82286.5 |
| 25773.0                | 32264.2 | 43114.0 | 59830.6 | 82286.7 |
| 25845.4                | 32448.6 | 43186.7 | 59970.7 | 82378.3 |
| 25849.5                | 32465.9 | 43191.2 | 59970.7 | 82378.3 |
| 25889.3                | 32504.3 | 43434.1 | 60710.2 | 87876.0 |
| 25889.8                | 32504.8 | 43503.3 | 60720.7 | 87886.4 |
| 26156.6                | 32643.6 | 43702.1 | 62832.3 | 88547.9 |
| 26195.1                | 32643.7 | 43702.5 | 65361.0 | 88996.0 |
| 26344.2                | 32657.3 | 43886.6 | 65410.9 | 89180.5 |
| 26612.4                | 32657.3 | 43887.3 | 66956.2 | 90072.7 |
| 26613.3                | 32738.9 | 44045.2 | 67376.8 | 90072.8 |
| 26640.7                | 32739.4 | 44045.2 | 67385.3 | 94640.6 |
| 27233.3                | 32777.3 | 44824.9 | 70446.3 | 95244.7 |
| 27370.6                | 32777.3 | 44825.5 | 70570.6 | 95251.8 |
| 27521.8                | 32817.7 | 52082.8 | 70593.2 | 95772.5 |
| 27619.3                | 32817.7 | 52083.1 | 70614.7 | 95860.7 |
| 27638.3                | 33251.1 | 52791.7 | 70615.0 | 96477.0 |
| 27638.4                | 33252.4 | 52792.2 | 70661.1 | 96477.3 |
| 27643.6                | 33559.1 | 52879.3 | 70661.6 | 96537.4 |
| 27654.2                | 33643.4 | 52946.5 | 70722.3 | 96537.7 |
| 27929.6                | 33643.4 | 53166.8 | 70800.8 |         |

**Table S18:** NEVPT2 computed 224 roots of quartet for **2**. All the values are reported herein cm<sup>-1</sup>.

| <b>2</b>               |         |         |         |         |
|------------------------|---------|---------|---------|---------|
| <b>Spin-free State</b> |         |         |         |         |
| 24037.7                | 27336.2 | 33065.5 | 52732.7 | 70297.1 |
| 24051.4                | 27637.0 | 33075.4 | 52777.1 | 70380.6 |
| 24051.6                | 27637.0 | 33100.8 | 52811.7 | 70380.7 |
| 24208.3                | 29413.9 | 33109.3 | 52814.9 | 70393.8 |
| 24208.6                | 29413.9 | 33133.6 | 52922.2 | 70394.5 |
| 24306.9                | 29566.4 | 33190.1 | 52959.4 | 70672.8 |
| 24313.7                | 29567.1 | 33866.0 | 53088.6 | 70728.1 |
| 24318.0                | 29596.2 | 33928.2 | 53117.7 | 71101.6 |
| 24360.8                | 29601.2 | 34182.9 | 53199.4 | 71160.2 |
| 24383.6                | 29611.1 | 34836.9 | 53270.9 | 71193.0 |
| 24401.9                | 29613.0 | 34881.6 | 53277.6 | 74807.4 |
| 24466.1                | 29670.6 | 34906.8 | 53494.9 | 75081.0 |
| 24498.3                | 29672.3 | 34928.4 | 53534.4 | 75146.2 |
| 24539.1                | 29695.1 | 35043.3 | 57964.2 | 75949.3 |
| 24549.5                | 29730.6 | 35266.8 | 57965.1 | 75958.8 |
| 24611.2                | 29805.2 | 35268.0 | 58004.0 | 79880.2 |
| 24620.8                | 29815.5 | 35364.0 | 58019.1 | 79889.8 |
| 24625.0                | 29844.6 | 35379.0 | 58025.3 | 79914.5 |
| 24646.9                | 30038.4 | 40399.1 | 58081.1 | 79924.3 |
| 24652.7                | 30038.5 | 40467.3 | 58084.2 | 79987.3 |
| 24738.8                | 30040.8 | 40689.4 | 58216.3 | 80068.5 |
| 24795.8                | 30093.3 | 40758.6 | 58216.3 | 80077.4 |
| 24815.8                | 30130.5 | 40908.9 | 58419.2 | 80383.5 |
| 24837.5                | 31716.9 | 41044.5 | 58419.2 | 80385.1 |
| 24846.3                | 31728.6 | 41047.2 | 58662.8 | 80809.6 |
| 24888.0                | 31738.8 | 42748.0 | 58662.9 | 80809.7 |
| 24929.2                | 31764.6 | 42772.3 | 58777.3 | 81039.6 |
| 25131.0                | 31774.7 | 42809.4 | 58777.3 | 81039.7 |
| 25146.1                | 31774.7 | 42891.7 | 60406.9 | 87896.2 |
| 25156.0                | 31792.9 | 42910.2 | 60508.9 | 87986.9 |
| 25262.9                | 31795.2 | 43022.5 | 61583.5 | 88098.5 |
| 25366.1                | 31795.2 | 43025.0 | 65298.1 | 88417.3 |
| 25592.8                | 31826.6 | 43137.9 | 65323.4 | 88473.5 |
| 25799.1                | 31827.9 | 43140.1 | 66259.2 | 89169.7 |
| 26002.5                | 31838.5 | 43261.9 | 66321.8 | 89173.6 |
| 26046.0                | 31838.8 | 43262.0 | 66338.4 | 94296.0 |
| 27048.9                | 31857.6 | 43559.9 | 69066.2 | 94475.4 |
| 27054.3                | 31859.3 | 43559.9 | 70108.5 | 94527.9 |
| 27059.7                | 31865.3 | 52013.7 | 70109.0 | 94769.2 |
| 27078.2                | 31865.4 | 52015.3 | 70110.7 | 94802.0 |
| 27113.6                | 32842.4 | 52453.3 | 70121.9 | 95039.5 |
| 27119.7                | 32843.9 | 52568.9 | 70126.5 | 95040.4 |
| 27135.3                | 32912.6 | 52573.0 | 70200.5 | 95200.0 |
| 27136.6                | 32912.7 | 52629.3 | 70203.0 | 95200.2 |
| 27336.2                | 33030.3 | 52640.5 | 70296.5 |         |

**Table S19:** NEVPT2 computed 224 roots of quartet for **3**. All the values are reported herein cm<sup>-1</sup>.

| <b>3</b>               |         |         |         |         |
|------------------------|---------|---------|---------|---------|
| <b>Spin-free State</b> |         |         |         |         |
| 23619.3                | 27297.2 | 32940.4 | 52570.1 | 70168.5 |
| 23953.1                | 27456.4 | 32961.6 | 52613.6 | 70176.7 |
| 23953.3                | 27456.4 | 32966.1 | 52711.1 | 70177.7 |
| 23965.7                | 29376.2 | 32985.6 | 52713.1 | 70215.0 |
| 24116.2                | 29376.4 | 33015.4 | 52746.1 | 70215.2 |
| 24117.7                | 29488.2 | 33023.0 | 52775.8 | 70530.7 |
| 24187.3                | 29489.4 | 33745.3 | 52881.6 | 70564.4 |
| 24196.0                | 29502.8 | 33797.2 | 52941.7 | 70857.0 |
| 24199.4                | 29509.3 | 34046.7 | 53022.2 | 70934.9 |
| 24244.6                | 29516.4 | 34768.2 | 53042.8 | 70946.8 |
| 24272.6                | 29524.5 | 34829.2 | 53047.5 | 74665.2 |
| 24394.7                | 29568.7 | 34842.7 | 53290.4 | 74915.3 |
| 24407.6                | 29583.8 | 34859.6 | 53364.2 | 74974.8 |
| 24422.9                | 29617.4 | 34885.1 | 57822.9 | 75695.8 |
| 24432.7                | 29637.8 | 35060.5 | 57822.9 | 75703.0 |
| 24452.3                | 29651.7 | 35087.6 | 57887.6 | 79702.0 |
| 24471.1                | 29678.4 | 35249.7 | 57909.2 | 79705.4 |
| 24471.4                | 29681.1 | 35264.4 | 57911.1 | 79793.9 |
| 24536.2                | 29933.7 | 40367.8 | 57978.3 | 79812.7 |
| 24577.1                | 29939.3 | 40463.8 | 57979.1 | 79852.4 |
| 24580.7                | 29940.5 | 40494.7 | 58093.4 | 79950.4 |
| 24682.4                | 29989.8 | 40599.7 | 58094.2 | 79970.8 |
| 24693.9                | 30001.0 | 40739.6 | 58249.4 | 80200.3 |
| 24703.0                | 31649.8 | 40899.5 | 58249.8 | 80202.2 |
| 24759.5                | 31650.6 | 40928.9 | 58438.8 | 80511.2 |
| 24888.1                | 31670.6 | 42685.0 | 58438.8 | 80512.1 |
| 24919.0                | 31671.8 | 42704.5 | 58606.1 | 80815.1 |
| 25129.3                | 31672.3 | 42718.5 | 58606.1 | 80815.1 |
| 25237.0                | 31672.4 | 42770.7 | 60299.5 | 87814.9 |
| 25300.0                | 31697.2 | 42798.0 | 60385.6 | 87866.2 |
| 25460.1                | 31704.1 | 42888.0 | 61362.0 | 87940.3 |
| 25545.8                | 31704.5 | 42888.2 | 65197.1 | 88187.8 |
| 25598.9                | 31704.9 | 43010.1 | 65223.2 | 88259.9 |
| 25854.9                | 31707.5 | 43011.8 | 66050.8 | 88910.2 |
| 25856.1                | 31716.7 | 43156.7 | 66132.2 | 88914.3 |
| 26092.0                | 31717.6 | 43156.7 | 66159.5 | 94163.6 |
| 26556.0                | 31731.1 | 43367.8 | 68941.3 | 94276.9 |
| 26742.6                | 31732.5 | 43367.8 | 69894.7 | 94291.0 |
| 26939.0                | 31732.9 | 51931.5 | 69931.9 | 94503.2 |
| 27050.0                | 31733.8 | 51932.3 | 69939.2 | 94538.3 |
| 27141.8                | 32782.6 | 52378.1 | 69949.8 | 94789.0 |
| 27148.4                | 32784.0 | 52494.9 | 69990.1 | 94793.9 |
| 27200.1                | 32821.5 | 52527.2 | 70053.8 | 94923.7 |
| 27203.6                | 32821.8 | 52535.7 | 70058.4 | 94924.2 |
| 27297.1                | 32933.6 | 52551.5 | 70145.1 |         |

**Table S20:** NEVPT2 computed 224 roots of quartet for **4**. All the values are reported herein cm<sup>-1</sup>.

| <b>4</b>               |         |         |         |         |
|------------------------|---------|---------|---------|---------|
| <b>Spin-free State</b> |         |         |         |         |
| 24111.6                | 27680.9 | 33284.8 | 52779.5 | 70381.3 |
| 24111.6                | 27953.3 | 33313.7 | 52792.1 | 70468.7 |
| 24315.8                | 27953.3 | 33344.3 | 53081.3 | 70544.8 |
| 24342.8                | 29546.4 | 33371.0 | 53082.4 | 70633.7 |
| 24368.0                | 29546.5 | 33382.8 | 53242.8 | 70633.9 |
| 24368.6                | 29774.8 | 33418.9 | 53244.1 | 70935.8 |
| 24411.2                | 29774.9 | 34210.9 | 53383.0 | 70968.0 |
| 24452.1                | 29782.3 | 34224.5 | 53442.3 | 71439.0 |
| 24453.1                | 29784.9 | 34680.6 | 53489.3 | 71539.2 |
| 24453.2                | 29786.2 | 34823.0 | 53493.1 | 71574.3 |
| 24670.1                | 29787.2 | 35079.3 | 53622.0 | 74788.9 |
| 24676.2                | 29886.0 | 35093.7 | 53834.4 | 75167.0 |
| 24699.6                | 29887.1 | 35106.6 | 53985.6 | 75220.1 |
| 24833.9                | 29944.5 | 35151.3 | 57999.5 | 76347.6 |
| 24834.6                | 29962.9 | 35340.5 | 58002.6 | 76349.8 |
| 24961.2                | 29974.7 | 35432.6 | 58051.2 | 79846.1 |
| 24976.5                | 30075.9 | 35734.2 | 58082.3 | 79859.6 |
| 25018.5                | 30081.4 | 35736.7 | 58093.5 | 79940.7 |
| 25045.4                | 30193.0 | 40486.5 | 58188.0 | 79985.4 |
| 25102.6                | 30230.0 | 40665.5 | 58189.1 | 80005.9 |
| 25131.8                | 30276.4 | 40761.0 | 58365.0 | 80201.1 |
| 25132.5                | 30282.2 | 41004.6 | 58365.1 | 80203.5 |
| 25161.2                | 30343.5 | 41064.1 | 58607.0 | 80575.6 |
| 25262.7                | 31947.7 | 41358.0 | 58607.1 | 80575.8 |
| 25387.6                | 31949.0 | 41363.2 | 58927.8 | 81089.3 |
| 25445.5                | 32012.7 | 42846.9 | 58927.8 | 81089.7 |
| 25461.7                | 32015.8 | 42880.1 | 59217.0 | 81529.4 |
| 25513.5                | 32020.2 | 42902.7 | 59217.0 | 81529.4 |
| 25561.2                | 32020.2 | 43008.4 | 60411.6 | 87891.0 |
| 25700.0                | 32028.2 | 43014.6 | 60486.3 | 87943.7 |
| 25709.1                | 32042.9 | 43170.0 | 61981.7 | 88035.2 |
| 25763.0                | 32044.1 | 43171.4 | 65246.6 | 88460.0 |
| 25822.1                | 32069.4 | 43354.5 | 65249.4 | 88482.0 |
| 25904.9                | 32069.9 | 43354.9 | 66529.4 | 89422.5 |
| 25914.1                | 32081.2 | 43580.8 | 66559.8 | 89424.0 |
| 25919.8                | 32081.6 | 43580.9 | 66618.8 | 94371.8 |
| 26064.9                | 32134.7 | 43911.9 | 69533.6 | 94539.7 |
| 26735.5                | 32134.7 | 43912.0 | 70183.1 | 94619.4 |
| 26769.4                | 32142.4 | 51945.1 | 70188.4 | 94975.0 |
| 26852.2                | 32142.4 | 51945.3 | 70189.2 | 94980.5 |
| 27305.3                | 33039.2 | 52586.4 | 70211.5 | 95448.0 |
| 27307.6                | 33039.5 | 52643.9 | 70219.7 | 95451.9 |
| 27488.6                | 33089.8 | 52689.4 | 70281.7 | 95518.8 |
| 27491.8                | 33090.5 | 52717.4 | 70281.8 | 95518.9 |
| 27680.9                | 33256.0 | 52743.1 | 70379.0 |         |

**Table S21:** NEVPT2 computed 224 roots of quartet for **5**. All the values are reported herein cm<sup>-1</sup>.

| <b>5</b>               |         |         |         |         |
|------------------------|---------|---------|---------|---------|
| <b>Spin-free State</b> |         |         |         |         |
| 24069.9                | 27453.3 | 33139.2 | 52770.3 | 70293.9 |
| 24070.1                | 27893.1 | 33180.3 | 52774.4 | 70365.4 |
| 24271.4                | 27893.1 | 33223.7 | 52887.8 | 70384.5 |
| 24278.1                | 29438.1 | 33286.3 | 52897.4 | 70384.6 |
| 24383.0                | 29438.1 | 33302.0 | 53074.2 | 70415.8 |
| 24407.8                | 29610.2 | 33326.9 | 53087.2 | 70723.5 |
| 24415.2                | 29610.2 | 33903.0 | 53205.4 | 70748.7 |
| 24438.1                | 29617.2 | 34255.5 | 53312.6 | 71260.3 |
| 24511.9                | 29618.1 | 34390.3 | 53325.1 | 71274.3 |
| 24524.5                | 29774.4 | 34817.6 | 53336.6 | 71421.4 |
| 24548.3                | 29774.7 | 34841.6 | 53402.4 | 74665.3 |
| 24620.0                | 29786.3 | 34872.7 | 53723.4 | 74944.7 |
| 24707.5                | 29789.1 | 34953.7 | 53753.4 | 75191.9 |
| 24723.2                | 29845.1 | 35127.8 | 57833.0 | 76100.7 |
| 24731.3                | 29863.7 | 35416.3 | 57836.5 | 76104.5 |
| 24734.3                | 29913.7 | 35422.7 | 57973.8 | 79678.1 |
| 24781.1                | 29968.1 | 35539.4 | 57989.7 | 79696.2 |
| 24789.3                | 29977.6 | 35556.7 | 58027.1 | 79838.1 |
| 24789.7                | 30069.9 | 40192.3 | 58078.0 | 79887.1 |
| 24956.2                | 30120.7 | 40705.6 | 58087.4 | 79957.4 |
| 24977.8                | 30120.7 | 40774.1 | 58237.4 | 80024.7 |
| 25020.3                | 30187.3 | 40788.7 | 58238.4 | 80038.2 |
| 25058.8                | 30298.9 | 40984.5 | 58479.9 | 80391.7 |
| 25082.3                | 31772.7 | 41208.5 | 58480.0 | 80394.3 |
| 25087.8                | 31773.0 | 41210.1 | 58807.5 | 80966.8 |
| 25135.9                | 31873.8 | 42715.3 | 58807.5 | 80966.8 |
| 25153.5                | 31875.4 | 42716.9 | 58952.7 | 81217.9 |
| 25249.3                | 31875.4 | 42857.3 | 58953.9 | 81218.0 |
| 25312.8                | 31882.9 | 42899.9 | 60193.2 | 87560.7 |
| 25359.3                | 31912.4 | 43002.5 | 60557.1 | 87901.9 |
| 25369.9                | 31928.6 | 43078.7 | 61752.0 | 87906.4 |
| 25375.0                | 31929.7 | 43124.6 | 65164.7 | 88356.5 |
| 25542.4                | 31948.6 | 43207.2 | 65168.5 | 88455.0 |
| 25543.1                | 31957.5 | 43219.7 | 66242.0 | 89217.3 |
| 26009.1                | 31960.9 | 43375.0 | 66404.9 | 89249.9 |
| 26485.2                | 31966.7 | 43375.4 | 66542.6 | 94175.3 |
| 26550.0                | 32032.7 | 43773.7 | 69288.6 | 94340.6 |
| 26578.9                | 32033.1 | 43773.8 | 70057.3 | 94543.6 |
| 26595.8                | 32033.5 | 51897.0 | 70060.9 | 94751.0 |
| 26727.2                | 32033.8 | 51897.3 | 70064.9 | 94845.0 |
| 27012.2                | 32908.4 | 52432.4 | 70064.9 | 95133.1 |
| 27261.1                | 32911.9 | 52434.4 | 70091.9 | 95149.3 |
| 27264.9                | 32955.8 | 52561.3 | 70167.4 | 95298.0 |
| 27324.1                | 32957.2 | 52567.3 | 70171.8 | 95298.6 |
| 27451.7                | 33123.9 | 52617.4 | 70291.8 |         |

**Table S22:** DFT-optimized geometry coordinates.

| 1  |                 |                 |                 |
|----|-----------------|-----------------|-----------------|
| Dy | 0.000000000000  | 0.000000000000  | 0.000000000000  |
| N  | 0.237478000000  | 0.955323000000  | 2.183555000000  |
| N  | -0.953451000000 | 0.238222000000  | 2.182404000000  |
| N  | 0.956073000000  | -0.238222000000 | 2.180903000000  |
| N  | -0.235322000000 | -0.954905000000 | 2.179571000000  |
| N  | -0.955825000000 | 0.233820000000  | -2.181058000000 |
| N  | -0.231760000000 | -0.956434000000 | -2.183666000000 |
| N  | 0.232215000000  | 0.955974000000  | -2.179673000000 |
| N  | 0.955825000000  | -0.233820000000 | -2.182365000000 |

| 2  |                 |                 |                 |
|----|-----------------|-----------------|-----------------|
| Dy | 0.000000000000  | 0.000000000000  | 0.000000000000  |
| P  | 1.364347000000  | 0.772382000000  | -2.470035000000 |
| P  | 0.759113000000  | -1.343829000000 | -2.439751000000 |
| P  | -1.364347000000 | -0.772382000000 | -2.470197000000 |
| P  | -0.759458000000 | 1.343641000000  | -2.439369000000 |
| P  | -1.284933000000 | -0.894153000000 | 2.470294000000  |
| P  | -0.878738000000 | 1.267074000000  | 2.440409000000  |
| P  | 1.290245000000  | 0.894153000000  | 2.468615000000  |
| P  | 0.884003000000  | -1.267670000000 | 2.438511000000  |

| 3  |                 |                 |                 |
|----|-----------------|-----------------|-----------------|
| Dy | 0.000000000000  | 0.000000000000  | 0.000000000000  |
| As | -0.019870000000 | -1.699453000000 | -2.410430000000 |
| As | -1.719218000000 | 0.017781000000  | -2.442727000000 |
| As | 0.015488000000  | 1.698905000000  | -2.416102000000 |
| As | 1.723600000000  | -0.017233000000 | -2.418255000000 |
| As | 1.231435000000  | 1.699614000000  | 2.072649000000  |
| As | 2.723129000000  | 0.009138000000  | 1.184388000000  |
| As | 1.251393000000  | -1.698916000000 | 2.065738000000  |
| As | -0.214755000000 | -0.009835000000 | 2.979493000000  |

| 4  |                 |                 |                 |
|----|-----------------|-----------------|-----------------|
| Dy | 0.000000000000  | 0.000000000000  | 0.000000000000  |
| C  | -1.180124000000 | 0.074436000000  | -2.356261000000 |
| C  | 0.042746000000  | -1.167379000000 | 2.335341000000  |
| H  | -2.272590000000 | 0.142828000000  | -2.441060000000 |
| H  | -0.021372000000 | -2.263532000000 | 2.393825000000  |
| P  | -0.085761000000 | -1.359406000000 | -2.468836000000 |
| P  | -1.256371000000 | 0.082915000000  | 2.526708000000  |
| C  | 1.180036000000  | -0.074464000000 | -2.354790000000 |
| H  | 2.272872000000  | -0.143390000000 | -2.430841000000 |
| P  | 0.085848000000  | 1.359434000000  | -2.469120000000 |
| C  | 0.183221000000  | 1.167450000000  | 2.328749000000  |
| H  | 0.251382000000  | 2.263713000000  | 2.379573000000  |

|   |                |                 |                |
|---|----------------|-----------------|----------------|
| P | 1.495894000000 | -0.082985000000 | 2.391714000000 |
|---|----------------|-----------------|----------------|

| 5  |                 |                 |                 |
|----|-----------------|-----------------|-----------------|
| Dy | 0.000000000000  | 0.000000000000  | 0.000000000000  |
| C  | -0.028061000000 | -1.221426000000 | -2.286059000000 |
| C  | 0.968759000000  | 1.221788000000  | 2.069668000000  |
| H  | -0.055063000000 | -2.320602000000 | -2.341122000000 |
| H  | 0.997220000000  | 2.321369000000  | 2.114478000000  |
| As | 1.479037000000  | -0.034525000000 | -2.455145000000 |
| As | 2.374261000000  | -0.010756000000 | 1.606113000000  |
| C  | 0.029490000000  | 1.221246000000  | -2.285961000000 |
| H  | 0.054281000000  | 2.320604000000  | -2.337490000000 |
| As | -1.480466000000 | 0.034705000000  | -2.442105000000 |
| C  | 0.954021000000  | -1.221666000000 | 2.078558000000  |
| H  | 0.968829000000  | -2.321186000000 | 2.131021000000  |
| As | -0.317266000000 | 0.010634000000  | 2.838437000000  |

**EDA Input File**

Task SinglePoint  
System

Atoms

*coordinates*

End

Charge -1.0

Engine ADF

Basis

Type TZ2P

Core None

End

SpinPolarization 5.0

Fragments

Region\_1 =/path/adf.rkf

Region\_2 =/path/adf.rkf

End

Save TAPE15

Print ETSLOWDIN-Unrestricted

Print NOCVHIRSHFELD

XC

Hybrid PBE0

DISPERSION GRIMME3 BJDAMP

End

Symmetry NOSYM

Unrestricted Yes

BeckeGrid

Quality Good



## Supporting Information

```
End
LOCORB
END
NumericalQuality Good
FullFock Yes
AOMat2File Yes
SCF
Iterations 800
End
UnrestrictedFragments Yes
ETSNOCV
Enabled Yes
End
EndEngine
eor
```

### **CASSCF Input File**

```
!DKH2 DKH-def2-SVP slowconv tightscf autoaux
```

```
%pal nprocs 40
end
```

```
%Maxcore 6000
```

```
%basis newgto Dy "SARC-DKH2-TZVP"
end
end
```

```
%method
SpecialGridAtoms 66
SpecialGridIntAcc 9
end
```

```
%casscf
nel 9
norb 7
mult 6,4
nroots 21,224
actorbs forbs
nevpt2 true
maxiter 100
ci
nguessmat 8000
maxiter 100
end
```

```
rel
dosoc true
gtensor true
```

## Supporting Information

printlevel 3  
NDoubGTensor 8  
domagnetization true  
dosusceptibility true

SUSTempMIN 2.0  
SUSTempMAX 300.0  
SUSNPoints 100

MAGTemperatureMIN 2.0  
MAGTemperatureMAX 5.0  
MAGTemperatureNPoints 4

MAGFieldMIN 0.0  
MAGFieldMAX 70000.0  
MAGNpoints 15

end

ANISO  
doaniso true  
MLTP 2,2,2,2,2,2,2,2  
TINT 0, 300, 100  
HINT 0, 7.0, 10  
TMAG 2.0, 3.0, 5.0  
CRYS\_element "Dy"  
CRYS\_charge 3  
PLOT true  
UBAR true  
end  
end

\*xyz -1 6  
Coord  
\*
